# Supplementary material for: The Effect of Geographic Units of Analysis on Measuring Geographic Variation in Medical Services Utilization
Source: PubMed Central journal article supplement — J Prev Med Public Health. 2016 Jul 14;49(4):230–9. doi: 10.3961/jpmph.16.034 (PMC4977766; doi:10.3961/jpmph.16.034), 2016-07-14
Supplement: jpmph-49-4-230-supple1.pdf [file jpmph-49-4-230-supple1.pdf]

**Supplemental Table 1.** Use of the eight selected procedures and annual rate (2013 period, Korea)

|      | No. of procedures | Annual rate per 100 000 population<br>(CSEC: per 1000 live births) |
|------|-------------------|--------------------------------------------------------------------|
| CABG | 3112              | 7.7                                                                |
| PTCA | 68 731            | 170.6                                                              |
| HIP  | 30 433            | 69.5                                                               |
| KNEE | 67 244            | 153.8                                                              |
| HYS  | 47 482            | 216.1                                                              |
| CSEC | 161 780           | 370.9                                                              |
| CT   | 7 100 895         | 15 735.1                                                           |
| MRI  | 1 304 966         | 2913.9                                                             |

CABG, coronary artery bypass graft surgery; PTCA, percutaneous transluminal coronary angioplasty; HIP, surgery after hip fracture; KNEE, knee-replacement surgery; HYS, hysterectomy; CSEC, caesarean section; CT, computed tomography scan; MRI, magnetic resonance image scan.
